# Supplementary material for: Bosutinib versus imatinib for newly diagnosed chronic phase chronic myeloid leukemia: final results from the BFORE trial
Source: PubMed Central journal article supplement (PMC9252917; doi:10.1038/s41375-022-01589-y), 2022-05-28
Supplement: 41375_2022_1589_MOESM1_ESM.pdf [file 41375_2022_1589_MOESM1_ESM.pdf]

## SUPPLEMENTARY MATERIALS

### Study Investigators

| <i>United States</i>        |                                   |
|-----------------------------|-----------------------------------|
| Jitendra Gandhi             | James McCloskey                   |
| Ilan Shapira                | Jamile M. Shammo                  |
| Srinivas Devarakonda        | Ehab L. Atallah                   |
| Peter D. Byeff              | Michael W. Deininger <sup>a</sup> |
| Jorge Cortes <sup>a,b</sup> | Jennifer F. Carney                |
| Stephen DiSean Kendall      | Stefano Tarantolo                 |
| Jan Cerny                   | Bernard J. Poiesz                 |
| Valeriy Sedov               | David Aboulafia                   |
| Luke Akard                  | Vivian Oehler                     |
| Ralph V. Boccia             | Ajit S. Maniam                    |
| Jeffrey D. Neidhart         | Stephen Medlin                    |
| Daniel Anderson             | Christopher M. Reynolds           |
| Andrew Kellum               | Irum Khan                         |
| Rosalind Catchatourian      | Vamsi K. Kota                     |
| Anthony Jaslowski           | R. Timothy Webb                   |
| Moshe Talpaz                | Thomas W. Butler                  |
| Satish Shah                 | Kerry Pulver                      |
| Saeeda Chowdhury            | Salman Malad                      |
| Jason H. Mendler            | Charles Kuzma                     |
| Michael E. Garrison         | Brenda W. Cooper                  |
| David A. Rizzieri           | Carrie L. Dul                     |

Michael J. Mauro<sup>a</sup>

Aileen Go

Reinhold Munker

Kelly B. Pendergrass

Stefan Faderl

Alice Mims

---

*Canada*

---

Ariah Schattner

Nizar Abdel-Samad

Rouslan Kotchetkov

Hadi Goubran

Jeffrey Lipton

Lambert Busque

Robert Delage

Brian Leber

Julie Stakiw

---

*South Africa*

---

Graham L. Cohen

Bernardo L. Rapoport

Lydia M. Dreosti

Nicolas Novitzky

Paul Ruff

---

*the Netherlands*

---

Jeroen J.W.M. Janssen

Edo Vellenga

---

*Belgium*

---

Fritz Offner

Marie Lejeune

Gregor Verhoef

Gaetan Vanstraelen

Lucien Noens

---

*France*

---

Eric Jourdan

Philippe Rousselot

Mauricette Michallet

Viviane Dubruille

Francoise Huguet

Laurence Legros

José-Miguel Torregrosa-Diaz

Gabriel Etienne

Cristina Precupanu

Frederic Maloisel

---

*Spain*

---

Valentin Garcia-Gutierrez

Luis Felipe Casado Montero

Juan Luis Steegmann

Guillermo Orti

Juan Carlos Hernandez-Boluda

Francisco Cervantes

Manuel Mateo Perez Encinas

Blanca Xicoy

Fermin Sánchez-Guijo

Ascension Pena

Santiago Osorio Prendes

Cristina Motllo

Pere Barba

---

*Finland*

---

Kimmo Porkka

Kari Remes

---

*Hungary*

---

Zita Borbényi

Gyorgy Ujj

Árpád Illés

Miklós Egyed

Judit Demeter

Zoltán Gasztonyi

---

*Ukraine*

---

Zvenyslava Maslyak

Svitlana Kalinina

Iryna Dyagil

Halyna Pylypenko

Nataliia Glushko

Grigoriy Rekhtman

---

*Italy*

---

Fabio Ciceri

Fabrizio Pane

Carlo Gambacorti-Passerini<sup>a</sup>

Emilio Usala

Paolo Di Bartolomeo

Bruno Martino

Elisabetta Abruzzese

Gianantonio Rosti

Alberto Bosi

Alessandro Rambaldi

Fabio Stagno

Renato Bassan

Germana Beltrami

Emanuele Angelucci

Angelo Michele Carella

---

*Czech Republic*

Marek Trneny

Petra Belohlavkova

Jiri Mayer

Edgar Faber

Hana Klamova

---

*Slovakia*

Martin Mistrik

Ludmila Demitrovicova

---

*United Kingdom*

Dragana Milojkovic

Jennifer Byrne

Jonathan Kell

Joanne Ewing

Graeme Smith

Ann Hunter

Richard Clark

Adam Mead

Sebastian Francis

Stewart McConnell

Sameer Tulpule

---

*Denmark*

Lene Udby

Marianne Severinsen

Jesper Stentoft

Hanne Vestergaard

---

*Sweden*

Johan Richter

Kourosh Lotfi

Ulla Olsson Stroemberg

Berit Markevärn

Leif Stenke

Mats Bjoereman

---

---

*Norway*

---

Henrik Hjorth-Hansen

Bjørn Tore Gjertsen

---

*Poland*

---

Marek Hus

Slawomira Kyrzcz-Krzemien

Tadeusz Robak

Tomasz Sacha

Andrzej Hellmann

Krzysztof Warzocha

Ewa Medras

Sebastian Grosicki

Kazimierz Kuliczkowski

---

*Germany*

---

Tim Brümmendorf<sup>a,b</sup>

Rainer Ordemann

Philipp le Coutre

Dietger Niederwieser

Gunhild von Arnsberg

Cornelius Waller

Andreas Hochhaus<sup>a</sup>

Dominik Wolf

Susanne Sauße

Jürgen Novotny

Kathleen Jentsch-Ullrich

---

*Mexico*

---

Rafael Hurtado Monroy

Enrique Baez de la Fuente

---

*Australia*

---

John Catalano

David Ross

Shir-Jing Ho

Anthony Schwarzer

Tim Hughes

---

*Singapore*

---

Charles Chuah<sup>a</sup>

Kiat Hoe Ong

Liang Piu Koh

---

---

***Thailand***

---

Tontanai Numbenjapon

Udomsak Bunworasate

Pimjai Niparuck

Surapol Issaragrisil

Adisak Tantiworawit

---

***Korea***

---

Dong-Wook Kim<sup>a</sup>

Dae Young Zang

Young Rok Do

Jae-Yong Kwak

Suk Joong Oh

Sung-Hyun Kim

---

***Taiwan***

---

Ken-Hong Lim

Lee-Yung Shih

Su-Peng Yeh

Ta-Chih Liu

Cheng-Hwai Tzeng

Yin-Hsun Feng

Jin-Hwang Liu

---

***Israel***

---

Noam Benyamini

Pia Raanani

---

<sup>a</sup>Study Management Committee member.

<sup>b</sup>Coordinating investigator.

## SUPPLEMENTARY METHODS

### Efficacy and safety assessments

Efficacy was evaluated by standard criteria, including molecular response (MR) reported on the international scale, cytogenetic response, and hematologic response.<sup>1</sup> Mutation analysis was performed in case of suboptimal response or treatment failure and at end of treatment. MRs assessed by real-time quantitative polymerase chain reaction and mutation analysis using Sanger sequencing were performed at a central laboratory (MolecularMD, Portland, OR, USA).

Safety was assessed as previously reported.<sup>1</sup> Frequency and characteristics of adverse events (AEs) of special interest were analyzed by selecting Medical Dictionary for Regulatory Activities (MedDRA) system organ class high-level group terms (HLGT), high-level terms (HLT), and preferred terms (PT), and standardized MedDRA queries (SMQ) to generate treatment-emergent AE (TEAE) clusters. MedDRA terms included in the TEAE clusters were:

- **Cardiac.** *HLGT:* Cardiac arrhythmias, Heart failures; *PT:* Cardiac death, Sudden cardiac death, Sudden death, Ejection fraction decreased; *SMQ:* Torsade de pointes / QT prolongation (narrow).
- **Edema.** *PT:* Contains Edema or Weight increased.
- **Effusion.** *PT:* Pericardial effusion or Pleural effusion.
- **Gastrointestinal.** *PT:* Nausea, Regurgitation, Retching, Vomiting, Vomiting projectile, Diarrhea, Defecation urgent, Frequent bowel movements, Gastrointestinal hypermotility.
- **Hypertension.** *HLGT:* Vascular hypertension disorders; *PT:* Blood pressure (BP) abnormal, BP ambulatory abnormal, BP ambulatory increased, BP diastolic abnormal, BP diastolic increased, BP increased, BP systolic abnormal, BP systolic increased.

- **Liver.** *Sub-SMQ (Narrow):* Cholestasis and jaundice of hepatic origin; Hepatic failure, fibrosis, and cirrhosis and other liver damage–related conditions; Hepatitis, non-infectious; *PT:* Alanine aminotransferase (ALT) abnormal, ALT increased, Aspartate aminotransferase (AST) abnormal, AST increased, Bilirubin conjugated abnormal, Bilirubin conjugated increased, Blood bilirubin abnormal, Blood bilirubin increased, Blood bilirubin unconjugated increased, Hepatic enzyme abnormal, Hepatic enzyme increased, Hepatic function abnormal, Hyperbilirubinemia, Hypertransaminasemia, Liver function test abnormal, Liver function test increased, Transaminase abnormal, Transaminase increased, Blood alkaline phosphatase abnormal, Blood alkaline phosphatase increased.
- **Metabolic.** Diabetes mellitus (*HLT:* Diabetes mellitus [including subtypes]), Hypercholesterolemia (*PT:* Hypercholesterolemia, blood cholesterol increased), Hyperlipidemia (*PT:* Hyperlipidemia, lipids increased), Hypertriglyceridemia (*PT:* Hypertriglyceridemia, blood triglycerides increased), Hyperglycemia (*PT:* Hyperglycemia, blood glucose increased).
- **Musculoskeletal.** *PT:* Arthralgia, Muscle spasms, Pain in extremity, Myalgia, Back pain, Bone pain, Musculoskeletal pain, Musculoskeletal stiffness, Joint stiffness, Musculoskeletal discomfort, Muscle fatigue, Muscle tightness, Muscle twitching, Joint swelling, Muscular weakness, Arthritis, Muscle discomfort, Muscular weakness.
- **Myelosuppression.** *SMQ (Narrow):* Hematopoietic cytopenias affecting more than one type of blood cell, Hematopoietic erythropenia, Hematopoietic leukopenia, Hematopoietic thrombocytopenia; *PT:* Bone marrow toxicity, Hematocrit decreased, Hemoglobin decreased, Hematotoxicity, Anemia.
- **Rash.** *HLT:* Rashes, Eruptions and exanthemas not elsewhere classified (NEC), Erythemas, Acnes, Dermatitis and eczema.



- **Renal.** *HLT:* Renal failure and impairment; *PT:* Blood creatinine abnormal, Blood creatinine increased, Creatinine renal clearance abnormal, Creatinine renal clearance decreased, Glomerular filtration rate abnormal, Glomerular filtration rate decreased.
- **Vascular** includes MedDRA terms for cardiovascular, cerebrovascular, and peripheral vascular TEAEs:
  - **Cardiovascular:** *HLGT:* Coronary artery disorders; *HLT:* Arterial therapeutic procedures (excluding aortic), Vascular imaging procedures NEC, Vascular therapeutic procedures NEC; *PT:* Transcatheter arterial chemoembolization.
  - **Cerebrovascular:** *HLT:* Central nervous system (CNS) hemorrhages and cerebrovascular accidents, CNS vascular disorders NEC, Transient cerebrovascular events.
  - **Peripheral vascular:** *HLGT:* Arteriosclerosis, stenosis, vascular insufficiency, and necrosis, Embolism and thrombosis; *HLT:* Non-site-specific vascular disorders NEC, Peripheral vascular disorders NEC (excluding PTs flushing and hot flush); *PT:* Intestinal ischemia.

In all analyses the following MedDRA PTs were clustered for cytopenias:

- Anemia: Anemia, Hemoglobin decreased.
- Neutropenia: Neutropenia, Neutrophil count decreased.
- Leukopenia: Leukopenia, White blood cell count decreased.
- Thrombocytopenia: Thrombocytopenia, Platelet count decreased.
- Lymphopenia: Lymphopenia, Lymphocyte count decreased.

Electrocardiograms (ECGs) were performed, in triplicate, predose on day 1, and on days 28, 56, and 84, and end of treatment. ECGs were also performed as clinically indicated.

Estimated glomerular filtration rate (eGFR) was calculated using the Modification of Diet in Renal Disease formula and graded on the basis of the Kidney Disease Improving Global

Outcomes criteria.<sup>2</sup>

### **Statistical analyses**

Exposure-adjusted incidence of TEAEs was calculated as the number of patients with TEAEs per total patient-year (sum of total time to first TEAE for all patients with TEAEs plus treatment duration for patients without TEAEs). Exact Poisson 95% confidence intervals (CIs) were provided.

Distribution-free CIs for the median GFR change from baseline based on Hahn and Meeker order statistics (ranks) were provided.

### **Time-to-event endpoints**

Time-to-event endpoints, except for duration of response (DOR) and overall survival (OS), were estimated using cumulative incidence, adjusting for the competing risk of treatment discontinuation without the event (event-free survival [EFS] analyzed as time to progression or death); DOR and OS were estimated using the Kaplan–Meier method. Patients without events were censored at the last valid assessment for the respective time-to-event endpoint. Patients without OS events were censored at last known alive date. Standard errors for 95% CI rates were constructed using a log(–log) transformation. Odds ratio and Mantel–Haenszel 95% CI for bosutinib versus imatinib were adjusted for Sokal risk group and geographic region unless specified otherwise. Hazard ratio and corresponding 95% CI for bosutinib versus imatinib for DOR and OS were based on a Cox proportional hazards model and, for EFS and time to response, on a proportional subdistribution hazards model (both stratified by Sokal risk group and geographic region). *P* values were based on a stratified Cochran–Mantel–Haenszel test for response, a stratified log-rank test for OS, and a stratified Gray’s test for EFS.

Multivariable proportional subdistribution hazards models predicting time to sustained MR<sup>4</sup> (intent-to-treat [ITT] population) and time to first cardiac, vascular, and effusion TEAE and grade  $\geq 3$  eGFR (safety population) were performed. Patients without events were censored at last valid molecular assessment for sustained MR<sup>4</sup> and last dose date for safety outcomes.

### **Control of type 1 error rate**

To address the issue of multiplicity, secondary endpoints were grouped into short-term and long-term families with the long-term family evaluated at the end of the study. Given the primary endpoint analysis was significant, each endpoint of the short-term family was tested via the Bonferroni's procedure at the 1-sided 0.0125 significance level. Complete cytogenetic response (CCyR) by 12 months was significant at the time of the primary endpoint analysis. If either major molecular response (MMR) by 18 months or CCyR by 12 months in the short-term family was significant, the long-term family endpoints were tested via the Holm stepwise test. The long-term secondary family endpoints (EFS, OS) were tested at either the 1-sided 0.025 alpha (if both CCyR by 12 months and MMR by 18 months were significant at 0.0125) or the 1-sided 0.0125 (if only one of the two endpoints was significant at 0.0125). This approach to multiple testing strongly controlled the overall type 1 error rate at the 1-sided 0.025 significance level. All family-wise comparisons were based on the modified ITT population (where applicable), which was consistent with the ITT population. No additional adjustment for multiple comparisons was made.

### **REFERENCES**

1. Cortes JE, Gambacorti-Passerini C, Deininger MW, Mauro MJ, Chuah C, Kim DW, et al. Bosutinib versus imatinib for newly diagnosed chronic myeloid leukemia: results from the randomized BFORE trial. *J Clin Oncol*. 2018;36:231-7.
2. Kidney Disease: Improving Global Outcomes (KDIGO): KDIGO 2012 clinical practice guideline for the evaluation and management of chronic kidney disease. *Kidney Int Suppl* 2013;3(1):1-150. doi 10.1038/kisup.2012.72. [https://kdigo.org/wp-content/uploads/2017/02/KDIGO\\_2012\\_CKD\\_GL.pdf](https://kdigo.org/wp-content/uploads/2017/02/KDIGO_2012_CKD_GL.pdf). Accessed 19 Mar, 2021.

**Supplementary Table 1** Demographic and baseline characteristics in patients randomized to bosutinib and imatinib.

| <b>Characteristic</b>                       | <b>Bosutinib</b>      | <b>Imatinib</b>       |
|---------------------------------------------|-----------------------|-----------------------|
|                                             | <b><i>n</i> = 268</b> | <b><i>n</i> = 268</b> |
| Age, median (range), y                      | 53 (18–84)            | 53 (19–84)            |
| Sex, <i>n</i> (%)                           |                       |                       |
| Male                                        | 156 (58.2)            | 155 (57.8)            |
| Female                                      | 112 (41.8)            | 113 (42.2)            |
| Race, <i>n</i> (%)                          |                       |                       |
| White                                       | 211 (78.7)            | 206 (76.9)            |
| Asian                                       | 33 (12.3)             | 34 (12.7)             |
| Black                                       | 10 (3.7)              | 10 (3.7)              |
| Other <sup>a</sup>                          | 14 (5.2)              | 18 (6.7)              |
| Sokal risk group at screening, <i>n</i> (%) |                       |                       |
| Low                                         | 95 (35.4)             | 106 (39.6)            |
| Intermediate                                | 117 (43.7)            | 105 (39.2)            |
| High                                        | 56 (20.9)             | 57 (21.3)             |
| ECOG performance status, <i>n</i> (%)       |                       |                       |

|                                                           |            |            |
|-----------------------------------------------------------|------------|------------|
| 0                                                         | 195 (72.8) | 194 (72.4) |
| 1                                                         | 73 (27.2)  | 74 (27.6)  |
| Philadelphia chromosome status, <i>n</i> (%) <sup>b</sup> |            |            |
| Positive                                                  | 249 (92.9) | 244 (91.0) |
| Negative                                                  | 6 (2.2)    | 6 (2.2)    |
| Unknown                                                   | 13 (4.9)   | 18 (6.7)   |
| <i>BCR&gt;::ABL1</i> transcript type, <i>n</i> (%)        |            |            |
| Typical (e13a2/e14a2)                                     | 265 (98.9) | 263 (98.1) |
| Atypical <sup>c</sup>                                     | 3 (1.1)    | 5 (1.9)    |

---

*ECOG* Eastern Cooperative Oncology Group, *Ph+* Philadelphia chromosome–positive.

<sup>a</sup>One patient with missing race in the imatinib arm is included in the “other” category.

<sup>b</sup>Negative was defined as 0 *Ph+* chromosomes of  $\geq 10$  metaphases at baseline; unknown includes missing data or 0 *Ph+* chromosomes of  $< 10$  metaphases at baseline.

<sup>c</sup>Includes one patient in the bosutinib arm with typical *BCR>::ABL1* transcripts detected postbaseline and one patient in the imatinib arm with no *BCR>::ABL1* transcripts detected at baseline who did not receive study drug.

**Supplementary Table 2** Baseline cardiovascular risk factors in patients receiving bosutinib and imatinib.

|                                            | <b>BFORE trial</b>    |                       | <b>BELA for reference<sup>a</sup></b> |                       |
|--------------------------------------------|-----------------------|-----------------------|---------------------------------------|-----------------------|
|                                            | <b>Bosutinib</b>      | <b>Imatinib</b>       | <b>Bosutinib</b>                      | <b>Imatinib</b>       |
| <b>Cardiovascular risk factors,</b>        | <b>400 mg QD</b>      | <b>400 mg QD</b>      | <b>500 mg QD</b>                      | <b>400 mg QD</b>      |
| <b><i>n</i> (%)</b>                        | <b><i>n</i> = 268</b> | <b><i>n</i> = 265</b> | <b><i>n</i> = 248</b>                 | <b><i>n</i> = 251</b> |
| History of cardiac disorders <sup>b</sup>  | 19 (7.1)              | 17 (6.4)              | 5 (2.0)                               | 13 (5.2)              |
| History of vascular disorders <sup>c</sup> | 35 (13.1)             | 42 (15.8)             | 17 (6.9)                              | 18 (7.2)              |
| History of hypertension <sup>d</sup>       | 91 (34.0)             | 81 (30.6)             | 48 (19.4)                             | 58 (23.1)             |
| History of tobacco use <sup>e</sup>        | 7 (2.6)               | 2 (0.8)               | 5 (2.0)                               | 0                     |
| History of hyperlipidemia <sup>f</sup>     | 45 (16.8)             | 50 (18.9)             | 26 (10.5)                             | 32 (12.7)             |
| History of diabetes mellitus <sup>g</sup>  | 31 (11.6)             | 33 (12.5)             | 14 (5.6)                              | 17 (6.8)              |
| BMI >30 kg/m <sup>2</sup>                  | 62 (23.1)             | 58 (21.9)             | 38 (15.3)                             | 39 (15.5)             |
| Age ≥65 years                              | 53 (19.8)             | 46 (17.4)             | 28 (11.3)                             | 26 (10.4)             |
| History of only 1 of above                 | 61 (22.8)             | 63 (23.8)             | 44 (17.7)                             | 47 (18.7)             |
| History of only 2 of above                 | 38 (14.2)             | 39 (14.7)             | 32 (12.9)                             | 28 (11.2)             |
| History of ≥3 of above                     | 56 (20.9)             | 47 (17.7)             | 20 (8.1)                              | 28 (11.2)             |

|                                 |            |            |           |            |
|---------------------------------|------------|------------|-----------|------------|
| History of $\geq 1$ risk factor | 155 (57.8) | 149 (56.2) | 96 (38.7) | 103 (41.0) |
|---------------------------------|------------|------------|-----------|------------|

---

*BMI* body mass index, *BP* blood pressure, *CNS* central nervous system, *HLGT* high-level group term, *HLT* high-level term, *MedDRA* Medical Dictionary for Regulatory Activities, *NEC* not elsewhere classified, *PT* preferred term, *QD* once daily, *SMQ* standardized MedDRA query.

<sup>a</sup>Based on the final database snapshot in 2015.

<sup>b</sup>Includes the MedDRA *HLGT*: Cardiac arrhythmias, Heart failures; *PT*: Cardiac death, Sudden cardiac death, Sudden death, Ejection fraction decreased; *SMQ*: Torsade de pointes / QT prolongation (narrow).

<sup>c</sup>Includes the MedDRA *HLGT*: Coronary artery disorders; Arteriosclerosis, stenosis, vascular insufficiency, and necrosis; Embolism and thrombosis; *HLT*: Arterial therapeutic procedures (excluding aortic), CNS hemorrhages and cerebrovascular accidents, CNS vascular disorders NEC, Non-site-specific vascular disorders NEC, Peripheral vascular disorders NEC (excluding PTs flushing and hot flush), Transient cerebrovascular events, Vascular imaging procedures NEC, Vascular therapeutic procedures NEC; *PT*: Intestinal ischemia, Transcatheter arterial chemoembolization.

<sup>d</sup>Includes the MedDRA *HLGT*: Vascular hypertension disorders; *PT*: BP abnormal, BP ambulatory abnormal, BP ambulatory increased, BP diastolic abnormal, BP diastolic increased, BP increased, BP systolic abnormal, BP systolic increased.

<sup>e</sup>Includes the MedDRA *PT*: Tobacco user, Ex-tobacco user, and Tobacco abuse.

<sup>f</sup>Includes the MedDRA *HLGT*: Lipid metabolism disorders; *PT*: Blood cholesterol increased, Blood triglycerides increased, Lipids increased.

<sup>g</sup>Includes the MedDRA *HLT*: Diabetes mellitus (including subtypes), Hyperglycemic conditions NEC; *PT*: Blood glucose increased, Glycosylated hemoglobin increased.



**Supplementary Table 3** Multivariable subdistributional hazards model for time to sustained MR<sup>4</sup>.

| Parameter                                                        | Test vs. reference              | 1-year sustained MR <sup>4</sup> | 2-year sustained MR <sup>4</sup> |
|------------------------------------------------------------------|---------------------------------|----------------------------------|----------------------------------|
|                                                                  |                                 | HR (95% CI)                      | HR (95% CI)                      |
| Age, y                                                           | 1 unit increase                 | 1.00 (0.99–1.01)                 | 1.00 (0.99–1.01)                 |
| Race                                                             | White vs. other                 | 1.16 (0.71–1.90)                 | 1.11 (0.64–1.92)                 |
| Gender                                                           | Male vs. female                 | 1.06 (0.80–1.40)                 | 1.16 (0.83–1.62)                 |
| ECOG PS                                                          | >0 vs. 0                        | 0.79 (0.57–1.11)                 | 0.63 (0.42–0.96)                 |
| Geographical region <sup>a</sup>                                 | Region 2 vs. 1                  | 1.23 (0.90–1.68)                 | 1.38 (0.97–1.98)                 |
|                                                                  | Region 3 vs. 1                  | 1.19 (0.66–2.13)                 | 1.27 (0.66–2.43)                 |
| Sokal risk group                                                 | Low vs. high                    | 0.96 (0.64–1.44)                 | 0.95 (0.60–1.51)                 |
|                                                                  | Intermediate vs. high           | 0.95 (0.64–1.41)                 | 0.93 (0.60–1.45)                 |
| Treatment group                                                  | Bosutinib vs. imatinib          | 1.09 (0.83–1.45)                 | 1.10 (0.79–1.54)                 |
| <i>BCR::ABL1</i> transcript levels ≤10% at 3 months <sup>b</sup> | ≤10% vs. no                     | 3.58 (2.46–5.22)                 | 3.88 (2.46–6.14)                 |
| First dose reduction to 300 mg <sup>b</sup>                      | Dose reduction vs. no reduction | 0.79 (0.57–1.11)                 | 0.84 (0.57–1.24)                 |
| CCI score <sup>c</sup>                                           | CCI >2 vs. 2                    | 1.12 (0.80–1.57)                 | 1.18 (0.79–1.76)                 |

HR <1 favors the reference group.

*CCI* Charlson Comorbidity Index score, *CI* confidence interval, *ECOG PS* Eastern Cooperative Oncology Group performance status, *HR* hazard ratio, *MR* molecular response.

<sup>a</sup>Region 1: United States, Canada, Western Europe; Region 2: Eastern Europe, Latin America, South America; Region 3: Rest of World.

<sup>b</sup>Time-dependent covariate.

<sup>c</sup>CCI score was calculated without the age component.

**Supplementary Table 4** Reason of death in patients receiving bosutinib or imatinib.

| Cause of death                           | Bosutinib<br><i>n</i> = 268 | Imatinib<br><i>n</i> = 265 |
|------------------------------------------|-----------------------------|----------------------------|
| Any reason (any time on study)           | 14 (5.2)                    | 14 (5.3)                   |
| AE unrelated to study drug               | 7 (2.6)                     | 3 (1.1)                    |
| AE related to study drug                 | 0                           | 1 (0.4)                    |
| Disease progression                      | 3 (1.1)                     | 4 (1.5)                    |
| Other                                    | 3 (1.1)                     | 6 (2.3)                    |
| Unknown                                  | 1 (0.4)                     | 0                          |
| Any reason (within 28 days of last dose) | 3 (1.1)                     | 4 (1.5)                    |
| AE unrelated to study drug               | 3 (1.1)                     | 2 (0.8)                    |
| AE related to study drug                 | 0                           | 1 (0.4)                    |
| Disease progression                      | 0                           | 1 (0.4)                    |

*AE* adverse event.

**Supplementary Table 5** Treatment-emergent adverse events.<sup>a</sup>

| <i>n</i> (%)                         | <b>Bosutinib (<i>n</i> = 268)</b> |                  | <b>Imatinib (<i>n</i> = 265)</b> |                  |
|--------------------------------------|-----------------------------------|------------------|----------------------------------|------------------|
|                                      | <b>Any grade</b>                  | <b>Grade 3/4</b> | <b>Any grade</b>                 | <b>Grade 3/4</b> |
| Any TEAE                             | 265 (98.9)                        | 197 (73.5)       | 262 (98.9)                       | 151 (57.0)       |
| Diarrhea                             | 201 (75.0)                        | 24 (9.0)         | 107 (40.4)                       | 3 (1.1)          |
| Nausea                               | 100 (37.3)                        | 0                | 112 (42.3)                       | 0                |
| Thrombocytopenia                     | 96 (35.8)                         | 38 (14.2)        | 53 (20.0)                        | 16 (6.0)         |
| ALT increased                        | 90 (33.6)                         | 56 (20.9)        | 16 (6.0)                         | 4 (1.5)          |
| AST increased                        | 69 (25.7)                         | 28 (10.4)        | 18 (6.8)                         | 5 (1.9)          |
| Rash                                 | 62 (23.1)                         | 2 (0.7)          | 39 (14.7)                        | 3 (1.1)          |
| Abdominal pain                       | 61 (22.8)                         | 5 (1.9)          | 25 (9.4)                         | 1 (0.4)          |
| Anemia                               | 59 (22.0)                         | 12 (4.5)         | 60 (22.6)                        | 15 (5.7)         |
| Headache                             | 59 (22.0)                         | 3 (1.1)          | 41 (15.5)                        | 3 (1.1)          |
| Fatigue                              | 57 (21.3)                         | 2 (0.7)          | 54 (20.4)                        | 0                |
| Lipase increased                     | 56 (20.9)                         | 36 (13.4)        | 30 (11.3)                        | 15 (5.7)         |
| Vomiting                             | 55 (20.5)                         | 3 (1.1)          | 54 (20.4)                        | 0                |
| Arthralgia                           | 48 (17.9)                         | 3 (1.1)          | 49 (18.5)                        | 1 (0.4)          |
| Pyrexia                              | 46 (17.2)                         | 3 (1.1)          | 30 (11.3)                        | 0                |
| Upper respiratory tract<br>infection | 37 (13.8)                         | 1 (0.4)          | 33 (12.5)                        | 0                |
| Nasopharyngitis                      | 36 (13.4)                         | 1 (0.4)          | 30 (11.3)                        | 0                |
| Constipation                         | 36 (13.4)                         | 0                | 17 (6.4)                         | 0                |
| Asthenia                             | 34 (12.7)                         | 0                | 24 (9.1)                         | 1 (0.4)          |
| Neutropenia                          | 33 (12.3)                         | 20 (7.5)         | 61 (23.0)                        | 36 (13.6)        |
| Back pain                            | 32 (11.9)                         | 1 (0.4)          | 25 (9.4)                         | 1 (0.4)          |
| Cough                                | 30 (11.2)                         | 0                | 26 (9.8)                         | 0                |
| Decreased appetite                   | 30 (11.2)                         | 1 (0.4)          | 17 (6.4)                         | 0                |

|                                           |           |          |           |          |
|-------------------------------------------|-----------|----------|-----------|----------|
| Pruritus                                  | 30 (11.2) | 1 (0.4)  | 10 (3.8)  | 0        |
| Dyspnea                                   | 29 (10.8) | 2 (0.7)  | 15 (5.7)  | 2 (0.8)  |
| Abdominal pain upper                      | 28 (10.4) | 0        | 27 (10.2) | 1 (0.4)  |
| Urinary tract infection                   | 27 (10.1) | 1 (0.4)  | 20 (7.5)  | 2 (0.8)  |
| Hypertension                              | 26 (9.7)  | 12 (4.5) | 29 (10.9) | 12 (4.5) |
| Pain in extremity                         | 26 (9.7)  | 2 (0.7)  | 39 (14.7) | 0        |
| Edema peripheral                          | 20 (7.5)  | 0        | 43 (16.2) | 1 (0.4)  |
| Leukopenia                                | 18 (6.7)  | 4 (1.5)  | 34 (12.8) | 12 (4.5) |
| Blood creatine<br>phosphokinase increased | 14 (5.2)  | 5 (1.9)  | 33 (12.5) | 10 (3.8) |
| Myalgia                                   | 13 (4.9)  | 1 (0.4)  | 48 (18.1) | 2 (0.8)  |
| Muscle spasms                             | 10 (3.7)  | 0        | 81 (30.6) | 1 (0.4)  |
| Periorbital edema                         | 4 (1.5)   | 0        | 44 (16.6) | 0        |

---

*ALT* alanine aminotransferase, *AST* aspartate aminotransferase, *TEAE* treatment-emergent adverse event.

<sup>a</sup>Any grade TEAEs occurring in  $\geq 10\%$  and/or grade 3 or 4 TEAEs occurring in  $\geq 5\%$  of patients in the bosutinib or imatinib arm.

**Supplementary Table 6** Laboratory abnormalities occurring in  $\geq 30\%$  of patients in the bosutinib or imatinib arm.

| Laboratory abnormality, <i>n</i> (%) | Bosutinib ( <i>n</i> = 268) |           | Imatinib ( <i>n</i> = 265) |           |
|--------------------------------------|-----------------------------|-----------|----------------------------|-----------|
|                                      | All grades                  | Grade 3/4 | All grades                 | Grade 3/4 |
| Increased creatinine                 | 252 (94.0)                  | 3 (1.1)   | 260 (98.1)                 | 2 (0.8)   |
| Decreased hemoglobin                 | 238 (88.8)                  | 23 (8.6)  | 239 (90.2)                 | 18 (6.8)  |
| Decreased lymphocytes                | 225 (84.0)                  | 33 (12.3) | 216 (81.5)                 | 37 (14.0) |
| Increased ALT                        | 183 (68.3)                  | 70 (26.1) | 75 (28.3)                  | 8 (3.0)   |
| Decreased platelets                  | 183 (68.3)                  | 38 (14.2) | 158 (59.6)                 | 16 (6.0)  |
| Increased glucose                    | 153 (57.1)                  | 8 (3.0)   | 172 (64.9)                 | 9 (3.4)   |
| Increased AST                        | 150 (56.0)                  | 36 (13.4) | 78 (29.4)                  | 9 (3.4)   |
| Decreased calcium                    | 147 (54.9)                  | 4 (1.5)   | 152 (57.4)                 | 3 (1.1)   |
| Decreased phosphate                  | 144 (53.7)                  | 25 (9.3)  | 184 (69.4)                 | 55 (20.8) |
| Increased lipase                     | 141 (52.6)                  | 51 (19.0) | 92 (34.7)                  | 21 (7.9)  |
| Decreased leukocytes                 | 134 (50.0)                  | 17 (6.3)  | 186 (70.2)                 | 22 (8.3)  |
| Decreased neutrophils                | 113 (42.2)                  | 25 (9.3)  | 171 (64.5)                 | 52 (19.6) |
| Increased alkaline phosphatase       | 110 (41.0)                  | 0         | 114 (43.0)                 | 1 (0.4)   |
| Increased creatine kinase            | 97 (36.2)                   | 8 (3.0)   | 172 (64.9)                 | 14 (5.3)  |
| Increased amylase                    | 85 (31.7)                   | 9 (3.4)   | 47 (17.7)                  | 6 (2.3)   |
| Decreased potassium                  | 34 (12.7)                   | 6 (2.2)   | 80 (30.2)                  | 8 (3.0)   |

*ALT* alanine aminotransferase, *AST* aspartate aminotransferase.

**Supplementary Table 7** Any grade AEs leading to permanent treatment discontinuation in  $\geq 1\%$  of patients receiving bosutinib or imatinib.

|                  | <b>Bosutinib</b> | <b>Imatinib</b> |
|------------------|------------------|-----------------|
| <i>n</i> (%)     | <i>n</i> = 268   | <i>n</i> = 265  |
| Any AE           | 68 (25.4)        | 38 (14.3)       |
| ALT increased    | 13 (4.9)         | 0               |
| AST increased    | 7 (2.6)          | 0               |
| Lipase increased | 5 (1.9)          | 2 (0.8)         |
| Diarrhea         | 4 (1.5)          | 3 (1.1)         |
| Thrombocytopenia | 3 (1.1)          | 4 (1.5)         |
| Neutropenia      | 3 (1.1)          | 1 (0.4)         |
| Muscle spasms    | 0                | 3 (1.1)         |
| Myalgia          | 0                | 3 (1.1)         |

*AE* adverse event, *ALT* alanine aminotransferase, *AST* aspartate aminotransferase.

Supplementary Fig. 1 Any grade AEs leading to permanent treatment discontinuation, by year.

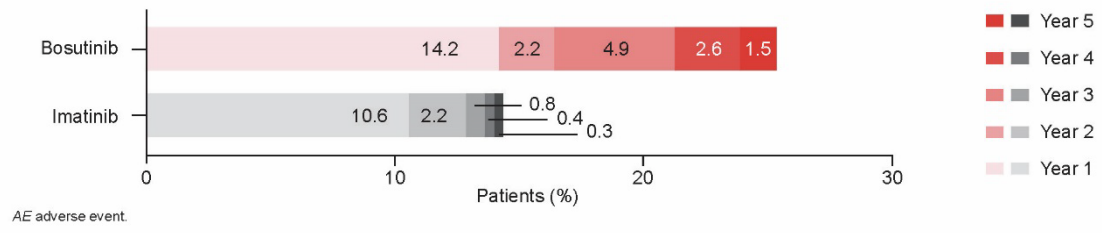



**Supplementary Table 8** Multivariable subdistributional hazards model for time to initial cardiac, vascular, and effusion TEAEs.

| Parameter <sup>a</sup>              | HR (95% CI)       |                   |                        |
|-------------------------------------|-------------------|-------------------|------------------------|
|                                     | Cardiac           | Vascular          | Effusion               |
| Age, y                              | 1.04 (1.02–1.07)  | 1.01 (0.98–1.04)  | 1.08 (1.01–1.16)       |
| Sex (male, female)                  | 0.87 (0.48–1.57)  | 1.49 (0.60–3.66)  | 1.36 (0.49–3.83)       |
| Race (White, other)                 | 1.38 (0.54–3.50)  | 1.74 (0.57–5.32)  | 0.55 (0.20–1.55)       |
| ECOG PS (>0, 0)                     | 1.57 (0.85–2.87)  | 0.40 (0.13–1.29)  | 1.16 (0.46–2.93)       |
| BMI, kg/m <sup>2</sup>              | 1.01 (0.96–1.08)  | 1.00 (0.94–1.07)  | 0.98 (0.90–1.07)       |
| History of (yes, no)                |                   |                   |                        |
| Tobacco use <sup>b</sup>            | 3.31 (0.80–13.74) | 2.86 (0.54–15.02) | <0.001 (<0.001–<0.001) |
| Cardiovascular disease <sup>c</sup> | N/A               | N/A               | 1.11 (0.36–3.48)       |
| Vascular disease <sup>d</sup>       | 0.70 (0.32–1.54)  | 4.76 (1.85–12.28) | N/A                    |
| Hypertension <sup>e</sup>           | 1.05 (0.55–2.03)  | 0.56 (0.20–1.57)  | 3.57 (0.91–14.01)      |
| Hyperlipidemia <sup>f</sup>         | 0.83 (0.42–1.63)  | 0.96 (0.30–3.14)  | 2.63 (0.97–7.14)       |
| Diabetes mellitus <sup>g</sup>      | 0.93 (0.46–1.86)  | 3.05 (1.03–9.07)  | N/A                    |
| Pulmonary disease <sup>h</sup>      | N/A               | N/A               | 3.74 (1.73–8.08)       |
| Cardiac disease <sup>i</sup>        | 3.45 (1.60–7.41)  | 0.48 (0.08–2.86)  | 0.24 (0.02–2.46)       |
| Hypertension TEAE <sup>j</sup>      | 3.08 (1.24–7.68)  | 2.13 (0.48–9.45)  | N/A                    |
| Vascular TEAE <sup>j</sup>          | 5.10 (1.51–17.23) | N/A               | N/A                    |
| Cardiac TEAE <sup>j</sup>           | N/A               | 7.94 (2.37–26.58) | N/A                    |
| Treatment (bosutinib, imatinib)     | 0.91 (0.47–1.74)  | 2.23 (0.97–5.09)  | 2.98 (1.08–8.19)       |

*BMI* body mass index, *BP* blood pressure, *CI* confidence interval, *CNS* central nervous system, *ECOG* Eastern Cooperative Oncology Group performance status, *HLGT* high-level group term, *HLT* high-level term, *HR* hazard ratio, *MedDRA* Medical Dictionary for Regulatory Activities, *N/A* not applicable, *NEC* not elsewhere classified, *PT* preferred term, *SMQ* standardized MedDRA query, *TEAE* treatment-emergent adverse event.

<sup>a</sup>Continuous variables are based on a 1-unit increase. For categorical variables, the level used as reference for each covariate was the second category listed for the covariate. HR >1 favors the reference group.

<sup>b</sup>Includes the MedDRA *PT*: Tobacco user, Ex-tobacco user, and Tobacco abuse.

<sup>c</sup>Includes the MedDRA *HLGT*: Coronary artery disorders; *HLT*: Arterial therapeutic procedures (excluding aortic), Vascular imaging procedures NEC, Vascular therapeutic procedures NEC; *PT*: Transcatheter arterial chemoembolization.

<sup>d</sup>Includes the MedDRA *HLGT*: Coronary artery disorders; Arteriosclerosis, stenosis, vascular insufficiency, and necrosis; Embolism and thrombosis; *HLT*: Arterial therapeutic procedures (excluding aortic), CNS hemorrhages and cerebrovascular accidents, CNS vascular disorders NEC, Non-site-specific vascular disorders NEC, Peripheral vascular disorders NEC (excluding PTs flushing and hot flush), Transient cerebrovascular events, Vascular imaging procedures NEC, Vascular therapeutic procedures NEC; *PT*: Intestinal ischemia, Transcatheter arterial chemoembolization.

<sup>e</sup>Includes the MedDRA *HLGT*: Vascular hypertension disorders; *PT*: BP abnormal, BP ambulatory abnormal, BP ambulatory increased, BP diastolic abnormal, BP diastolic increased, BP increased, BP systolic abnormal, BP systolic increased.

<sup>f</sup>Includes the MedDRA *HLGT*: Lipid metabolism disorders; *PT*: Blood cholesterol increased, Blood triglycerides increased, Lipids increased.

<sup>g</sup>Includes the MedDRA *HLT*: Diabetes mellitus (including subtypes), Hyperglycemic conditions NEC; *PT*: Blood glucose increased, Glycosylated hemoglobin increased.

<sup>h</sup>Includes the MedDRA *HLGT*: Bronchial disorders (excluding neoplasms), Lower respiratory tract disorders (excluding obstruction and infection), Pleural disorders, Pulmonary vascular disorders, Respiratory disorders NEC; *PT*: Pleuropericarditis, Pulmonary arterial pressure increased.

<sup>i</sup>Includes the MedDRA *HLGT*: Cardiac arrhythmias, Heart failures; *PT*: Cardiac death, Sudden cardiac death, Sudden death, Ejection fraction decreased; *SMQ*: Torsade de pointes / QT prolongation (narrow).

<sup>j</sup>Time-dependent covariates.

**Supplementary Table 9** Exposure-adjusted incidence of select any grade AEs of special interest.

|                                                          | BFORE trial                              |                                         | BELA for reference <sup>a</sup>          |                                         |
|----------------------------------------------------------|------------------------------------------|-----------------------------------------|------------------------------------------|-----------------------------------------|
|                                                          | Bosutinib<br>400 mg QD<br><i>n</i> = 268 | Imatinib<br>400 mg QD<br><i>n</i> = 265 | Bosutinib<br>500 mg QD<br><i>n</i> = 248 | Imatinib<br>400 mg QD<br><i>n</i> = 251 |
| Exposure-adjusted incident rate<br>(95% CI) <sup>b</sup> |                                          |                                         |                                          |                                         |
| Cardiac TEAEs <sup>c</sup>                               | 0.031 (0.020–0.046)                      | 0.029 (0.018–0.043)                     | 0.024 (0.015–0.037)                      | 0.019 (0.010–0.031)                     |
| Vascular TEAEs <sup>d</sup>                              |                                          |                                         |                                          |                                         |
| Cardiovascular                                           | 0.015 (0.008–0.026)                      | 0.001 (<0.001–0.007)                    | 0.008 (0.003–0.017)                      | 0.006 (0.002–0.014)                     |
| Cerebrovascular                                          | 0.002 (<0.001–0.008)                     | 0.004 (0.001–0.010)                     | 0.002 (<0.001–0.008)                     | 0.002 (<0.001–0.009)                    |
| Peripheral vascular                                      | 0.007 (0.002–0.015)                      | 0.007 (0.003–0.016)                     | 0.006 (0.002–0.014)                      | 0.002 (<0.001–0.009)                    |
| Effusion TEAEs <sup>e</sup>                              |                                          |                                         |                                          |                                         |
| Pleural effusion                                         | 0.016 (0.009–0.027)                      | 0.006 (0.002–0.014)                     | 0.023 (0.014–0.035)                      | 0.001 (<0.001–0.007)                    |
| Pericardial effusion                                     | 0.006 (0.002–0.013)                      | 0.001 (<0.001–0.007)                    | 0.007 (0.003–0.015)                      | 0.000 (0.000–0.004)                     |

*AE* adverse event, *CI* confidence interval, *CNS* central nervous system, *HLGT* high-level group term, *HLT* high-level term, *MedDRA* Medical Dictionary for Regulatory Activities, *NEC* not elsewhere classified, *PT* preferred term, *QD* once daily, *SMQ* standardized MedDRA query, *TEAE* treatment-emergent adverse event.

<sup>a</sup>Based on the final database snapshot in 2015.

<sup>b</sup>Exposure-adjusted incidence rate calculated as the number of patients with TEAEs / total patient-year, where total patient-year = sum of total time to first TEAE for all patients with TEAEs and treatment duration for patients without TEAEs.

<sup>c</sup>Includes the MedDRA *HLGT*: Cardiac arrhythmias, Heart failures; *PT*: Cardiac death, Sudden cardiac death, Sudden death, Ejection fraction decreased; *SMQ*: Torsade de pointes / QT prolongation (narrow).

<sup>d</sup>Vascular includes MedDRA terms for cardiovascular, cerebrovascular, and peripheral vascular TEAEs:

- **Cardiovascular:** *HLGT*: Coronary artery disorders; *HLT*: Arterial therapeutic procedures (excluding aortic), Vascular imaging procedures NEC, Vascular therapeutic procedures NEC; *PT*: Transcatheter arterial chemoembolization.
- **Cerebrovascular:** *HLT*: CNS hemorrhages and cerebrovascular accidents, CNS vascular disorders NEC, Transient cerebrovascular events.
- **Peripheral vascular:** *HLGT*: Arteriosclerosis, stenosis, vascular insufficiency, and necrosis; Embolism and thrombosis; *HLT*: Non-site-specific vascular disorders NEC, Peripheral vascular disorders NEC (excluding PTs flushing and hot flush); *PT*: Intestinal ischemia.

<sup>e</sup>Includes the MedDRA *PT*: Pericardial effusion, Pleural effusion.

**Supplementary Fig. 2 Median change from baseline. A eGFR. B Blood creatinine. C Blood urea nitrogen over time in patients receiving bosutinib or imatinib.**

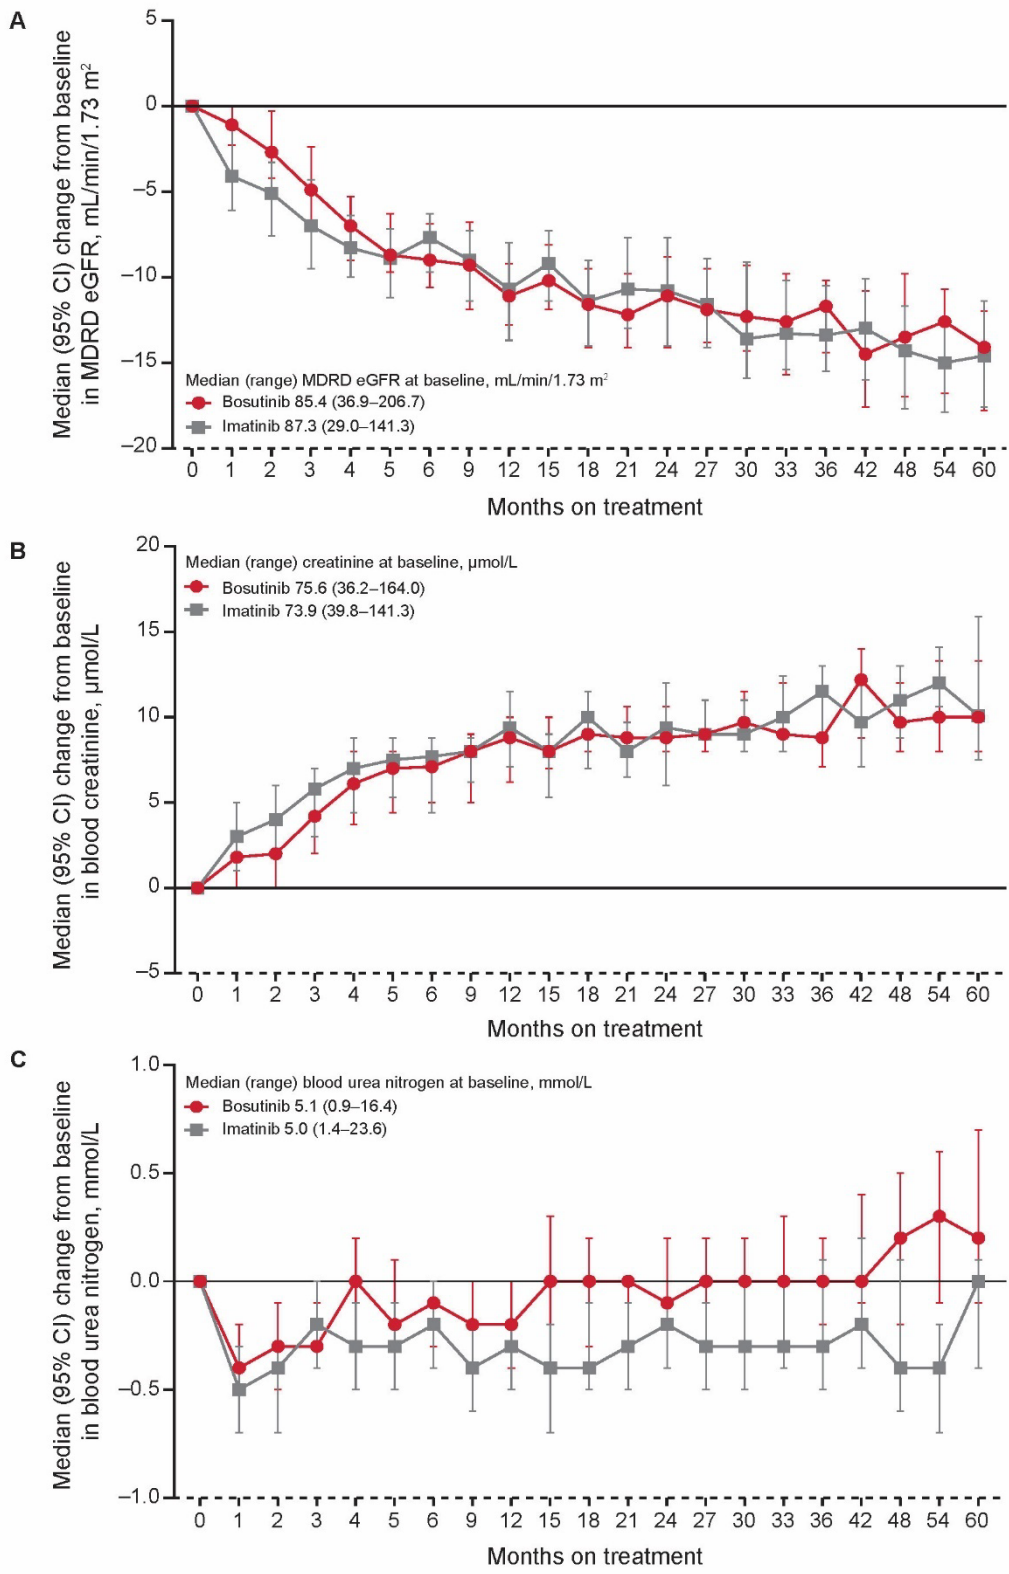

CI confidence interval, eGFR estimated glomerular filtration rate, MDRD Modification of Diet in Renal Disease.

**Supplementary Table 10** Maximum blood urea nitrogen on or after initial eGFR <45 vs. on-treatment for eGFR ≥45 mL/min/1.73 m<sup>2</sup> in patients receiving bosutinib or imatinib.

|                                                | <b>Bosutinib</b>               |                             | <b>Imatinib</b>                |                             |
|------------------------------------------------|--------------------------------|-----------------------------|--------------------------------|-----------------------------|
|                                                | <b>eGFR &lt;45<sup>a</sup></b> | <b>eGFR ≥45<sup>a</sup></b> | <b>eGFR &lt;45<sup>a</sup></b> | <b>eGFR ≥45<sup>a</sup></b> |
|                                                | <b>n = 37</b>                  | <b>n = 229</b>              | <b>n = 23</b>                  | <b>n = 241</b>              |
| Blood urea nitrogen (mmol/L)<br>median (range) | 11.3 (6.7–49.6)                | 6.4 (1.9–48.6)              | 7.9 (3.4–28.2)                 | 6.1 (1.2–86.0)              |

*eGFR* estimated glomerular filtration rate.

<sup>a</sup>eGFR measured in mL/min/1.73 m<sup>2</sup>.

**Supplementary Table 11** Multivariable subdistributional hazards model for time to initial grade  $\geq 3b$  eGFR.

| Parameter <sup>a</sup>                    | HR     | 95% CI        |
|-------------------------------------------|--------|---------------|
| Age, y                                    | 1.06   | 1.03–1.08     |
| Sex (male, female)                        | 0.86   | 0.50–1.48     |
| Race (White, other)                       | 0.49   | 0.26–0.94     |
| ECOG PS (>0, 0)                           | 2.50   | 1.49–4.20     |
| BMI, kg/m <sup>2</sup>                    | 1.02   | 0.96–1.08     |
| Baseline eGFR, mL/min/1.73 m <sup>2</sup> | 0.94   | 0.91–0.96     |
| History of (yes, no)                      |        |               |
| Tobacco use <sup>b</sup>                  | <0.001 | <0.001–<0.001 |
| Cardiovascular disease <sup>c</sup>       | 0.75   | 0.36–1.54     |
| Hypertension <sup>d</sup>                 | 1.10   | 0.60–2.04     |
| Renal disease <sup>e</sup>                | 5.74   | 2.68–12.30    |
| Diabetes mellitus <sup>f</sup>            | 2.78   | 1.58–4.89     |
| Hyperuricemia <sup>g</sup>                | 0.39   | 0.09–1.75     |
| Heart failure <sup>h</sup>                | 1.30   | 0.35–4.87     |
| Treatment (bosutinib, imatinib)           | 1.39   | 0.85–2.30     |

*BMI* body mass index, *BP* blood pressure, *CI* confidence interval, *ECOG PS* Eastern Cooperative Oncology Group performance status, *eGFR* estimated glomerular filtration rate, *HLGT* high-level group term, *HLT* high-level term, *HR* hazard ratio, *MedDRA* Medical Dictionary for Regulatory Activities, *NEC* not elsewhere classified, *PT* preferred term.

<sup>a</sup>Continuous variables are based on a 1-unit increase. For categorical variables, the level used as reference for each covariate was the second category listed for the covariate. HR >1 favors the reference group.

<sup>b</sup>Includes the MedDRA *PT*: Tobacco user, Ex-tobacco user, and Tobacco abuse.



<sup>c</sup>Includes the MedDRA *HLGT*: Coronary artery disorders; *HLT*: Arterial therapeutic procedures (excluding aortic), Vascular imaging procedures NEC, Vascular therapeutic procedures NEC; *PT*: Transcatheter arterial chemoembolization.

<sup>d</sup>Includes the MedDRA *HLGT*: Vascular hypertension disorders; *PT*: BP abnormal, BP ambulatory abnormal, BP ambulatory increased, BP diastolic abnormal, BP diastolic increased, BP increased, BP systolic abnormal, BP systolic increased.

<sup>e</sup>Includes the MedDRA *HLGT*: Nephropathies; *HLT*: Renal failure and impairment; *PT*: Blood creatinine abnormal, Blood creatinine increased, Creatinine renal clearance abnormal, Creatinine renal clearance decreased, Glomerular filtration rate abnormal, Glomerular filtration rate decreased, Albuminuria, Proteinuria.

<sup>f</sup>Includes the MedDRA *HLT*: Diabetes mellitus (including subtypes), Hyperglycemic conditions NEC; *PT*: Blood glucose increased, Glycosylated hemoglobin increased.

<sup>g</sup>Includes the MedDRA *PT*: Hyperuricemia, Blood uric acid increased.

<sup>h</sup>Includes the MedDRA *HLGT*: Heart failures.

# Comparing bosutinib with imatinib in people with newly diagnosed chronic myeloid leukemia: 5-year follow-up results

Please note that this summary only contains information from the full scientific article:

[View Scientific Article](#)

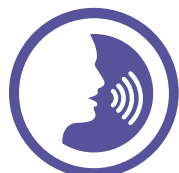

**Bosutinib** <boh-SOO-tih-nib>

**Chromosome** <KROH-muh-some>

**Chronic myeloid leukemia**  
<KRAH-nik MY-eh-loyd loo-KEE-mee-uh>

**Imatinib** <ih-MA-tih-nib>

**Tyrosine kinase inhibitor**  
<TY-ruh-seen KY-nays in-HIH-bih-ter>

**Date of summary:** April 2022

**Study number:** NCT02130557

**Study start date:** July 2014

**Study end date:** April 2020

**The full title of this article:** Bosutinib versus imatinib for newly diagnosed chronic phase chronic myeloid leukemia: final results from the BFORE trial

## Key takeaway

- In this study, people who took Bosulif (bosutinib) for treating newly diagnosed chronic myeloid leukemia (CML for short) had a quicker and greater response to treatment than those who took imatinib.
- Most of the side effects that patients experienced could be controlled with help from the doctors, and no new or unexpected side effects were seen with longer follow-up.

## Additional information

More information can be found in the scientific article of this study, which you can access here:

[View Scientific Article](#)

For more information on this study, please visit:

<https://www.clinicaltrials.gov/ct2/show/NCT02130557>

For more information on clinical studies in general, please visit:

<https://www.clinicaltrials.gov/ct2/about-studies/learn>

<http://www.cancerresearchuk.org/about-cancer/find-a-clinical-trial/what-clinical-trials-are>

**The purpose of this plain language summary is to help you to understand the findings from recent research.**

- Bosutinib and imatinib are approved to treat the condition under study that is discussed in this summary.
- This summary reports the results of a single study. The results of this study may differ from those of other studies. Health professionals should make treatment decisions based on all available evidence, not on the results of a single study.

**More information can be found in the scientific article of this study, which you can access here: [View Scientific Article](#)**

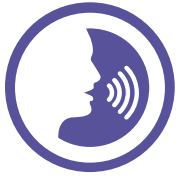

**Bosutinib** <boh-SOO-tih-nib>

**Chromosome** <KROH-muh-some>

**Chronic myeloid leukemia**  
<KRAH-nik MY-eh-loyd loo-KEE-mee-uh>

**Imatinib** <ih-MA-tih-nib>

**Tyrosine kinase inhibitor**  
<TY-ruh-seen KY-nays in-HIH-bih-ter>

## What did this study look at?

- Chronic myeloid leukemia (CML for short) is a type of cancer that affects mainly white blood cells. Chronic means that it tends to progress slowly over many years.
  - CML is caused by formation of an abnormal gene called BCR-ABL1.
  - Genes are segments of DNA that tell cells in the body how to make a single protein. They are found in structures called chromosomes within each cell of the body.
  - The BCR-ABL1 gene is found in a chromosome called the Philadelphia chromosome and can be identified in CML cells and in some acute lymphoblastic leukemia cancer cells.
- Bosutinib is a type of medicine known as a tyrosine kinase inhibitor (TKI for short).
  - Tyrosine kinases are proteins in the body that control how cells grow and divide.
  - The BCR-ABL1 gene makes a tyrosine kinase that is more active than normal and helps leukemia cells grow.
  - Bosutinib works by blocking the more active tyrosine kinase in the cancer cells, causing them to die.
- In this study, researchers compared bosutinib with another TKI, imatinib, as a treatment for people with newly diagnosed CML.
- This summary describes the efficacy (efficacy is how well a drug works in a clinical trial) and safety of bosutinib compared to imatinib in this group of people after 5 years of follow-up.

## Where is this study in the drug development timeline?

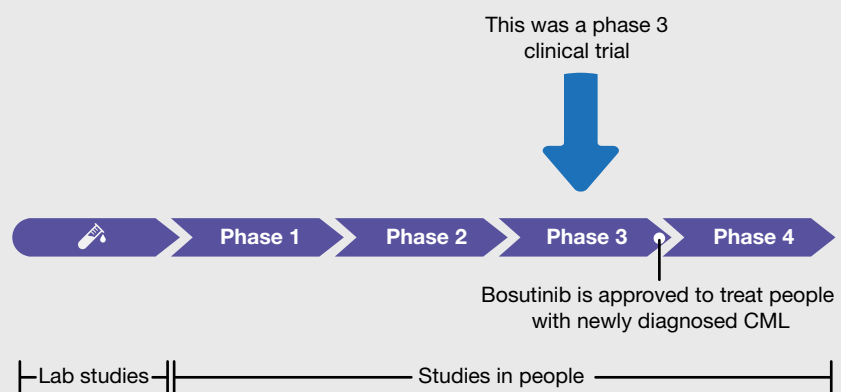

## Additional information

More information can be found in the scientific article of this study, which you can access here:

[View Scientific Article](#)

For more information on this study, please visit:

<https://www.clinicaltrials.gov/ct2/show/NCT02130557>

For more information on clinical studies in general, please visit:

<https://www.clinicaltrials.gov/ct2/about-studies/learn>

<http://www.cancerresearchuk.org/about-cancer/find-a-clinical-trial/what-clinical-trials-are>

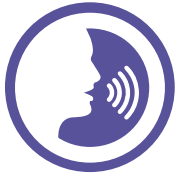

**Bosutinib** <boh-SOO-tih-nib>

**Chromosome** <KROH-muh-some>

**Chronic myeloid leukemia**  
<KRAH-nik MY-eh-loyd loo-KEE-mee-uh>

**Imatinib** <ih-MA-tih-nib>

**Tyrosine kinase inhibitor**  
<TY-ruh-seen KY-nays in-HIH-bih-ter>

## Who took part in this study?

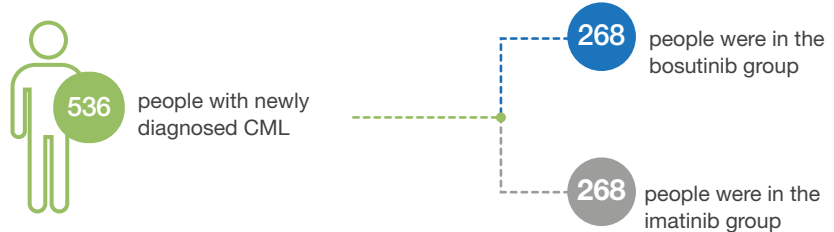

Although 268 people started the study in the imatinib group, 3 did not receive treatment.

- At the start of the study, researchers grouped people with CML based on the risk of their CML rapidly progressing and their likelihood of survival.
  - This grouping (known as the Sokal risk group) was based on various factors, including age, blood test results, and other clinical features.

## What were the results of the study?

At the end of the study, in both treatment groups:

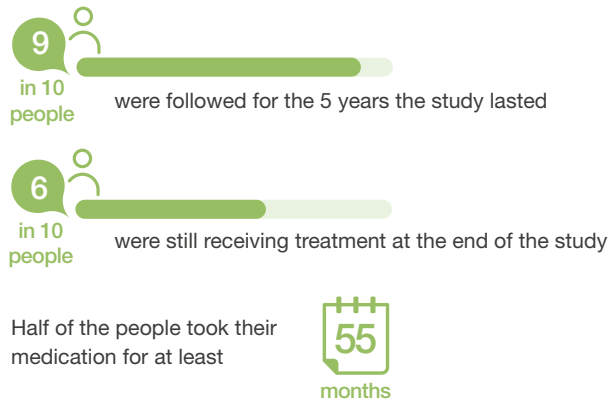

### Efficacy

- Researchers looked at whether treatment with bosutinib or imatinib lowered the amount of the BCR-ABL1 gene in the blood.
  - People who respond well to treatment have lower BCR-ABL1 levels. This means they have fewer leukemia cells containing the BCR-ABL1 gene.
- People who took bosutinib had lower levels of the BCR-ABL1 gene compared to those who took imatinib.

During the 5-year period people had:

**Low** levels of the BCR-ABL1 gene (also known as a major molecular response or MMR for short) after taking their medication

**Very low** levels of the BCR-ABL1 gene (also known as molecular response 4 or MR<sup>4</sup> for short) after taking their medication

**Extremely low** levels of the BCR-ABL1 gene (also known as molecular response 4.5 or MR<sup>4.5</sup> for short) after taking their medication

Of the people who took bosutinib

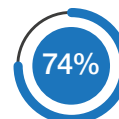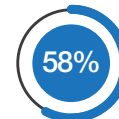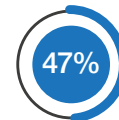

Of the people who took imatinib

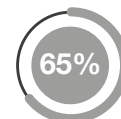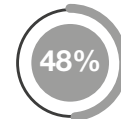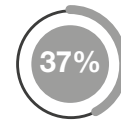

## Additional information

More information can be found in the scientific article of this study, which you can access here:

[View Scientific Article](#)

For more information on on this study, please visit:

<https://www.clinicaltrials.gov/ct2/show/NCT02130557>

For more information on clinical studies in general, please visit:

<https://www.clinicaltrials.gov/ct2/about-studies/learn>

<http://www.cancerresearchuk.org/about-cancer/find-a-clinical-trial/what-clinical-trials-are>



**Bosutinib** <boh-SOO-tih-nib>

**Chromosome** <KROH-muh-some>

**Chronic myeloid leukemia**  
<KRAH-nik MY-eh-loyd loo-KEE-mee-uh>

**Imatinib** <ih-MA-tih-nib>

**Tyrosine kinase inhibitor**  
<TY-ruh-seen KY-nays in-HIH-bih-ter>

- When comparing BCR-ABL1 gene levels in people taking bosutinib and those taking imatinib, the largest difference was seen among people in the Sokal high-risk group.

### The proportion of people with low levels of the BCR-ABL1 gene (known as MMR), by risk group

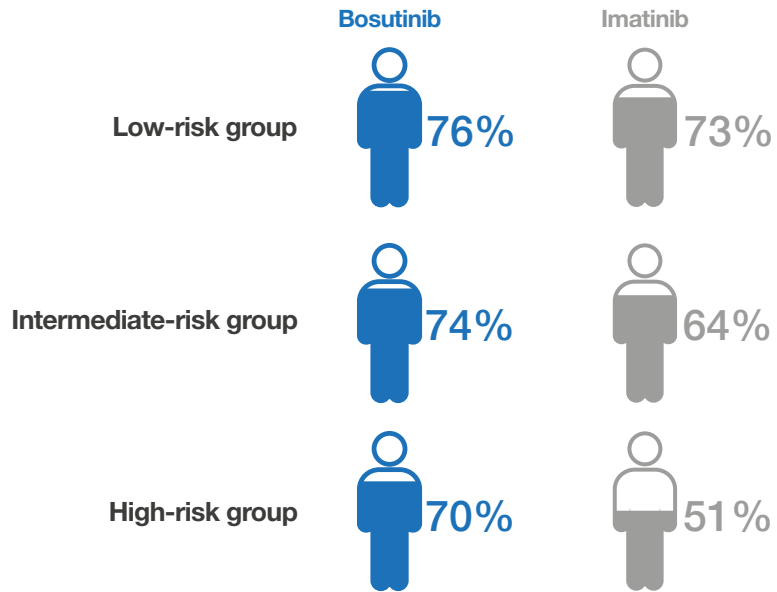

- In people who had lower levels of the BCR-ABL1 gene after treatment:
  - low BCR-ABL1 gene levels were achieved more quickly with bosutinib than in people taking imatinib
  - low levels of the BCR-ABL1 gene were maintained for a similar length of time with either treatment.
- There were no differences between treatments in:
  - how long people lived overall
  - how long people lived without their CML returning.

### The likelihood that a person is alive after 5 years

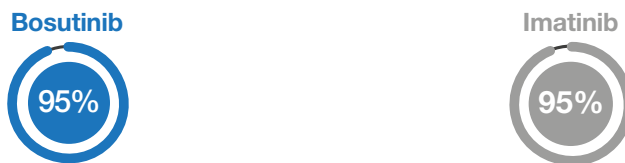

### The likelihood that after 5 years, a person's CML returns or they die

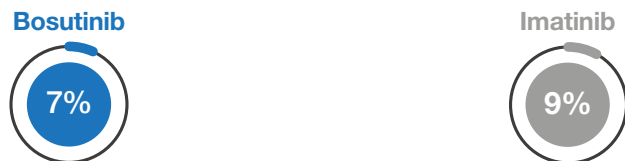

## Additional information

More information can be found in the scientific article of this study, which you can access here:

[View Scientific Article](#)

For more information on this study, please visit:

<https://www.clinicaltrials.gov/ct2/show/NCT02130557>

For more information on clinical studies in general, please visit:

<https://www.clinicaltrials.gov/ct2/about-studies/learn>

<http://www.cancerresearchuk.org/about-cancer/find-a-clinical-trial/what-clinical-trials-are>



**Bosutinib** <boh-SOO-tih-nib>

**Chromosome** <KROH-muh-some>

**Chronic myeloid leukemia**  
<KRAH-nik MY-eh-loyd loo-KEE-mee-uh>

**Imatinib** <ih-MA-tih-nib>

**Tyrosine kinase inhibitor**  
<TY-ruh-seen KY-nays in-HIH-bih-ter>

## Safety

- Most people who took part in this study experienced side effects, with most side effects occurring during the first year of treatment.
  - A side effect is something (expected or unexpected) that you feel was caused by a medicine or treatment you take.

### The proportion of people who had side effects

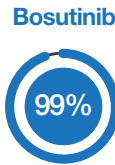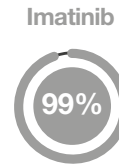

### The proportion of people who had severe\* side effects

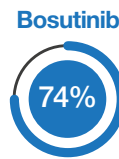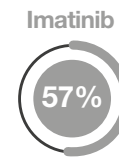

\* A side effect is considered 'severe' when it limits daily activities such as bathing and dressing, is disabling or is medically significant, or could be life-threatening, need hospital care, or cause lasting problems.

- Researchers looked at the type of side effects people had while taking their medicine. Compared to people who took imatinib, those who took bosutinib had:
  - more side effects that affected their liver, skin, or stomach and intestines
  - less swelling in parts of their body, and less pain in their muscles and bones.

## Additional information

More information can be found in the scientific article of this study, which you can access here:

[View Scientific Article](#)

For more information on this study, please visit:

<https://www.clinicaltrials.gov/ct2/show/NCT02130557>

For more information on clinical studies in general, please visit:

<https://www.clinicaltrials.gov/ct2/about-studies/learn>

<http://www.cancerresearchuk.org/about-cancer/find-a-clinical-trial/what-clinical-trials-are>



**Bosutinib** <boh-SOO-tih-nib>

**Chromosome** <KROH-muh-some>

**Chronic myeloid leukemia**  
<KRAH-nik MY-eh-loyd loo-KEE-mee-uh>

**Imatinib** <ih-MA-tih-nib>

**Tyrosine kinase inhibitor**  
<TY-ruh-seen KY-nays in-HIH-bih-ter>

## The proportion of people who had certain types\* of side effects

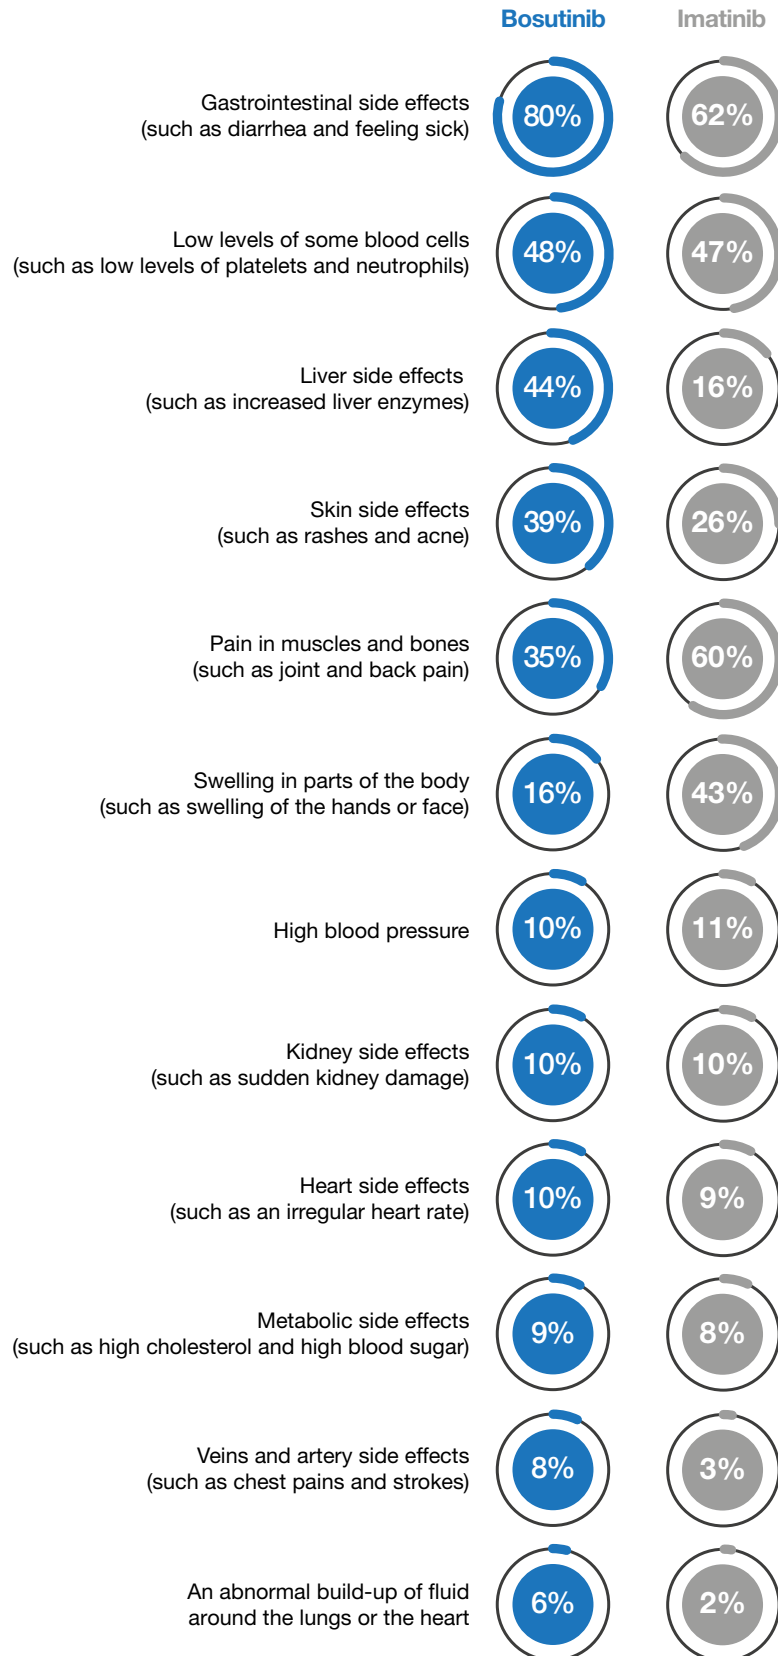

## Additional information

More information can be found in the scientific article of this study, which you can access here:

[View Scientific Article](#)

For more information on on this study, please visit:

<https://www.clinicaltrials.gov/ct2/show/NCT02130557>

For more information on clinical studies in general, please visit:

<https://www.clinicaltrials.gov/ct2/about-studies/learn>

<http://www.cancerresearchuk.org/about-cancer/find-a-clinical-trial/what-clinical-trials-are>

\* Using the Medical Dictionary for Regulatory Activities (MedDRA for short), similar types of side effects were grouped.



**Bosutinib** <boh-SOO-tih-nib>

**Chromosome** <KROH-muh-some>

**Chronic myeloid leukemia**  
<KRAH-nik MY-eh-loyd loo-KEE-mee-uh>

**Imatinib** <ih-MA-tih-nib>

**Tyrosine kinase inhibitor**  
<TY-ruh-seen KY-nays in-HIH-bih-ter>

- To help reduce side effects, researchers sometimes recommend that people:
  - reduce the dose of bosutinib or imatinib they take,
  - temporarily stop taking the medication, or
  - take another medication to treat the side effects (like an anti-diarrhea medication).

#### Proportion of people who had the dose of their medication reduced due to side effects

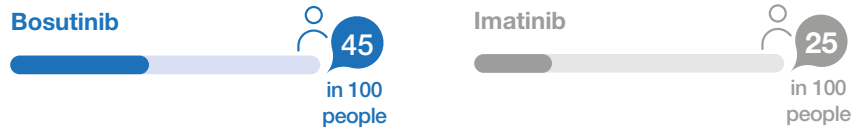

#### Proportion of people who temporarily stopped taking their medication due to side effects

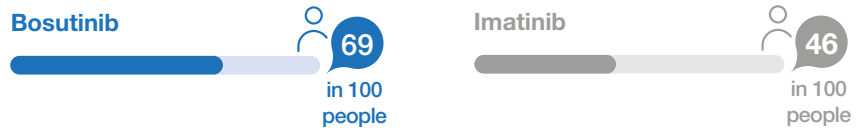

- The most common reasons for people completely stopping their treatment were side effects and the treatment not working well enough.

#### Proportion of people completely stopping treatment due to side effects

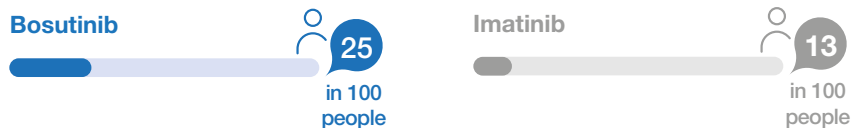

#### Proportion of people completely stopping treatment due to their treatment not working well enough

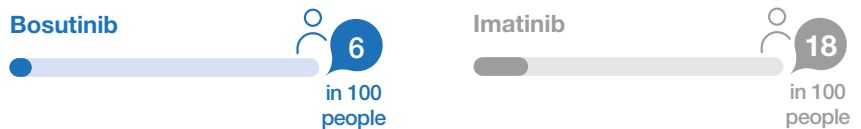

## Additional information

More information can be found in the scientific article of this study, which you can access here:

[View Scientific Article](#)

For more information on on this study, please visit:

<https://www.clinicaltrials.gov/ct2/show/NCT02130557>

For more information on clinical studies in general, please visit:

<https://www.clinicaltrials.gov/ct2/about-studies/learn>

<http://www.cancerresearchuk.org/about-cancer/find-a-clinical-trial/what-clinical-trials-are>





**Bosutinib** <boh-SOO-tih-nib>

**Chromosome** <KROH-muh-some>

**Chronic myeloid leukemia**  
<KRAH-nik MY-eh-loyd loo-KEE-  
mee-uh>

**Imatinib** <ih-MA-tih-nib>

**Tyrosine kinase inhibitor**  
<TY-ruh-seen KY-nays in-HIH-bih-ter>

## What were the main conclusions reported by the researchers?

- After 5 years, compared to imatinib, people who took bosutinib:
  - had an earlier response and lower BCR-ABL1 gene levels
  - lived for a similar length of time overall
  - lived for a similar length of time without their CML returning or dying.
- Most of the side effects that patients experienced could be controlled with help from the doctors, and no new or unexpected side effects were seen with longer follow-up.
- These results support the use of bosutinib as a treatment for people with newly diagnosed CML.

## Who sponsored this study?

Pfizer Inc.  
235 East 42nd Street, NY, NY 10017  
Phone (United States): +1 212-733-2323

**Pfizer would like to thank all of the people who took part in this study.**

## Additional information

More information can be found in the scientific article of this study, which you can access here:

[View Scientific Article](#)

For more information on this study, please visit:

<https://www.clinicaltrials.gov/ct2/show/NCT02130557>

For more information on clinical studies in general, please visit:

<https://www.clinicaltrials.gov/ct2/about-studies/learn>

<http://www.cancerresearchuk.org/about-cancer/find-a-clinical-trial/what-clinical-trials-are>

### Scientific Article

Brümmendorf TH, Cortes JE, Milojkovic D, et al. Bosutinib versus imatinib for newly diagnosed chronic phase chronic myeloid leukemia: final results from the BFORE trial. *Leukemia*, 2022; doi: 10.1038/s41375-022-01589-y

### Acknowledgements

Writing support for this summary was provided by Gemma Shay, PhD, and David Sunter, PhD, CMPP, of Engage Scientific Solutions, and was funded by Pfizer. The original authors of the full article were involved in preparing this summary.
